# Supplementary material
Source: publisher figshare collection journal article supplement (https://karger.figshare.com/ndownloader/files/13637867)
Supplement: Supplementary file 1 [file 13637867]

## **Supplementary Material**

# **ATP Citrate Lyase and LncRNA NONMMUT010685 Play Crucial Role in Nonalcoholic Fatty Liver Disease Based on Analysis of Microarray Data**

Tao-tao Ma<sup>a,b</sup> Cheng Huang<sup>b</sup> Ying Nie<sup>a</sup> You Yang<sup>a</sup> Jun Li<sup>b</sup>

<sup>a</sup>School of Clinical Medicine, Anhui Medical University, Hefei, <sup>b</sup>Anhui Province Key Laboratory of Major Autoimmune Diseases, Anhui Institute of Innovative Drugs, School of Pharmacy, Anhui Medical University, Hefei, China

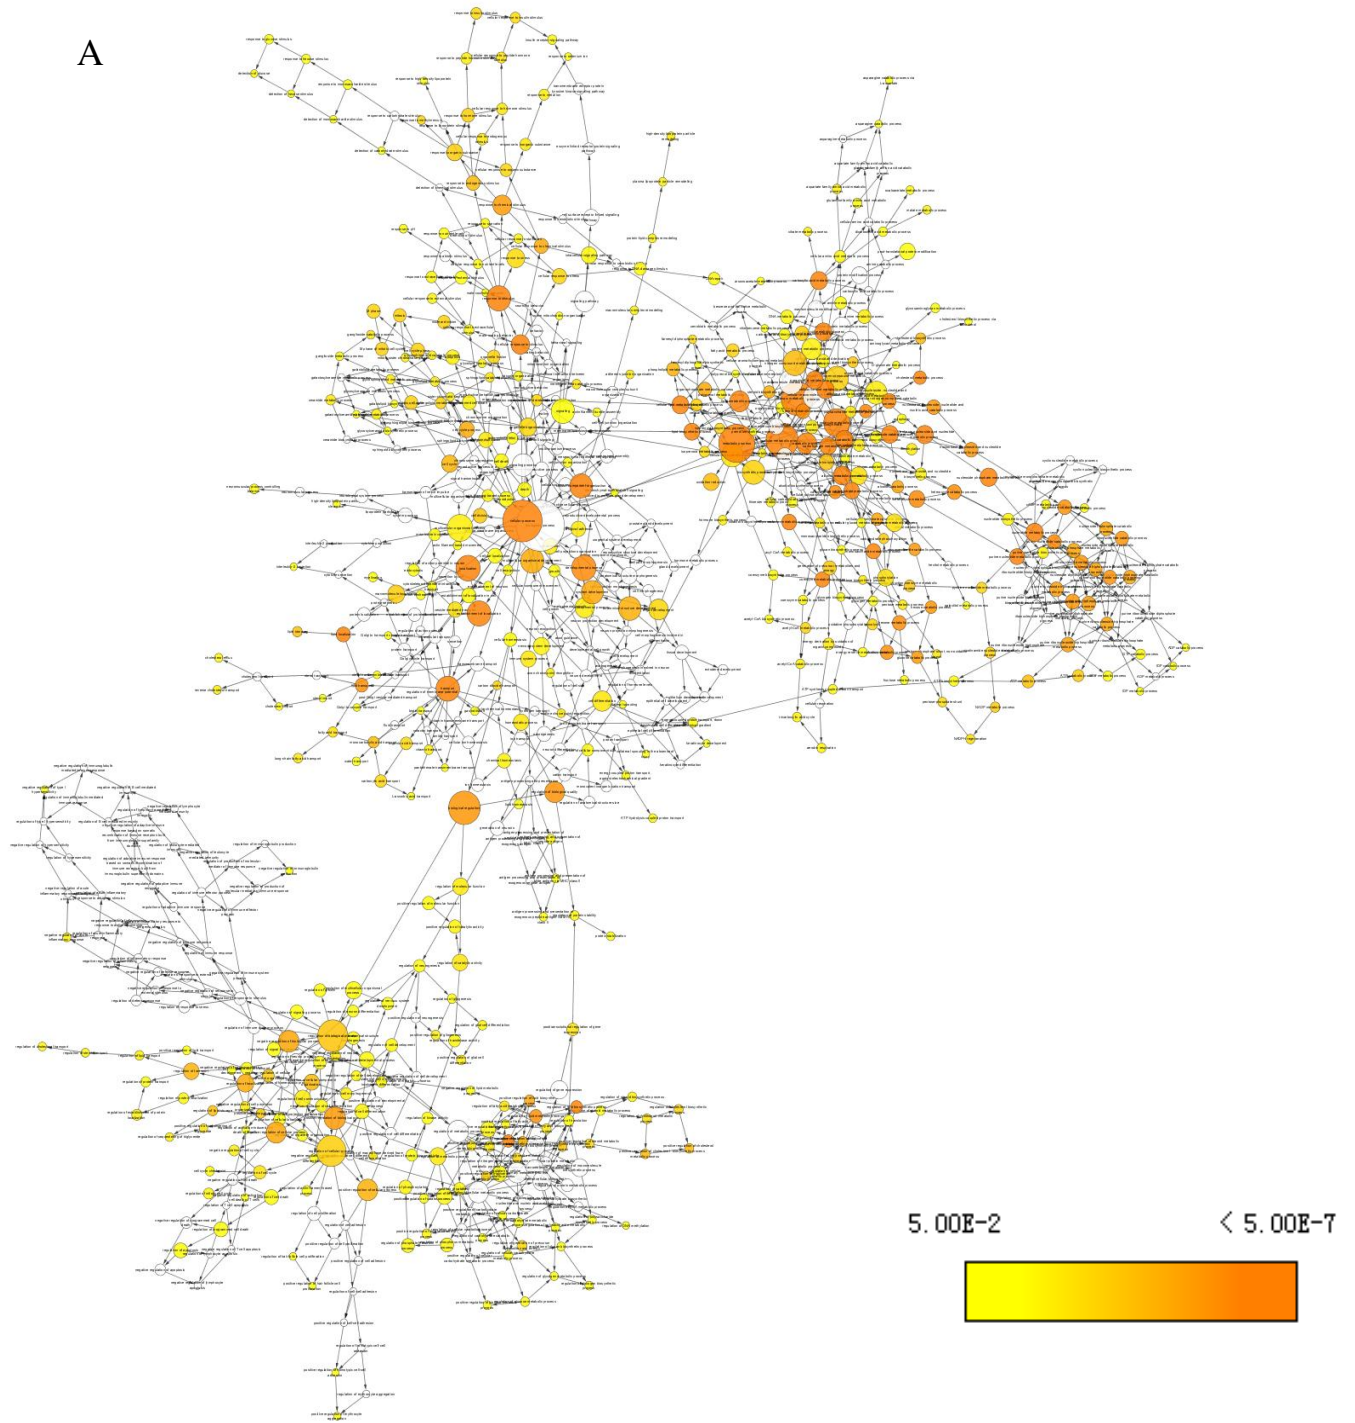

B

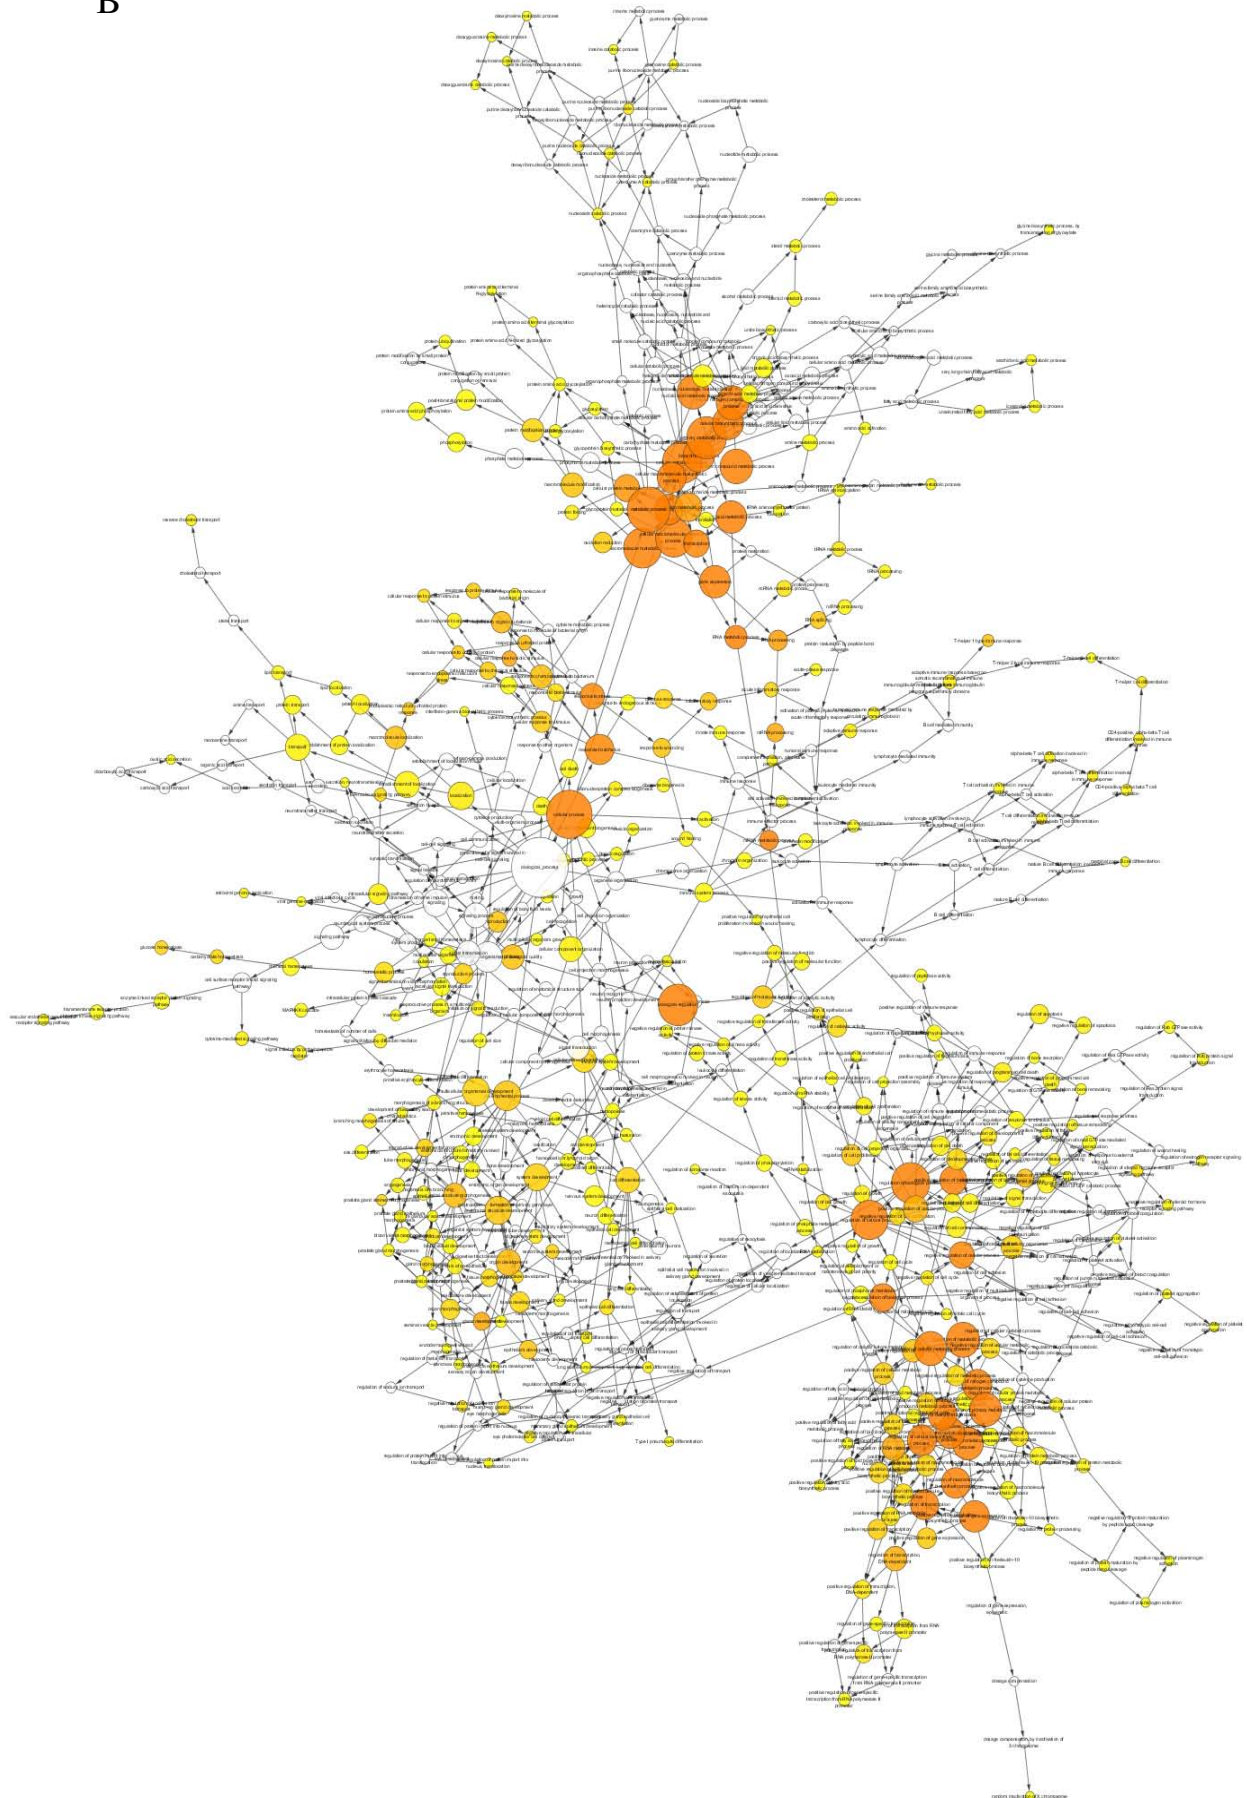

**Down regulated genes GO-net**

A

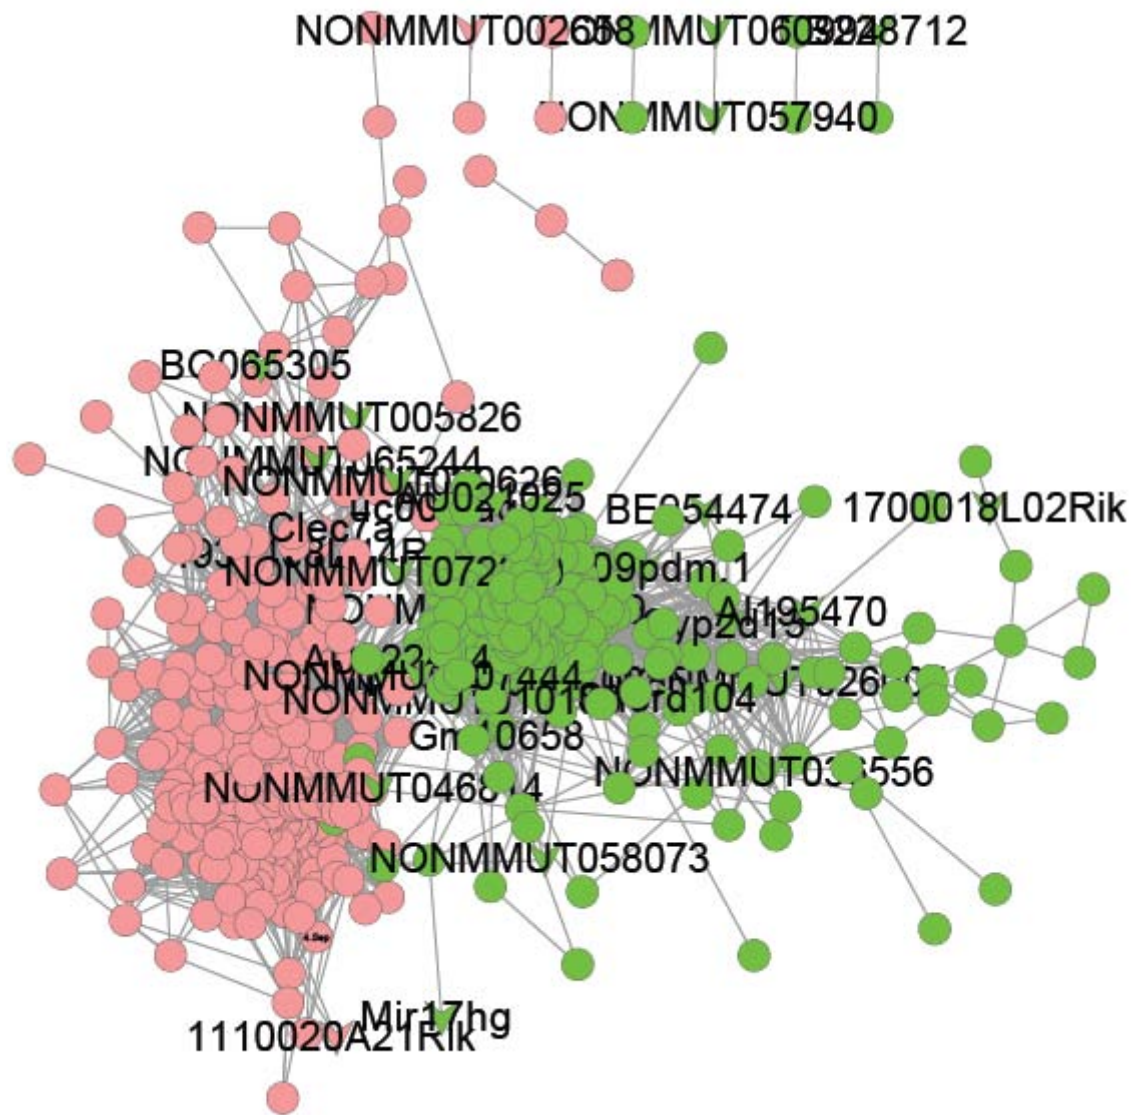

B

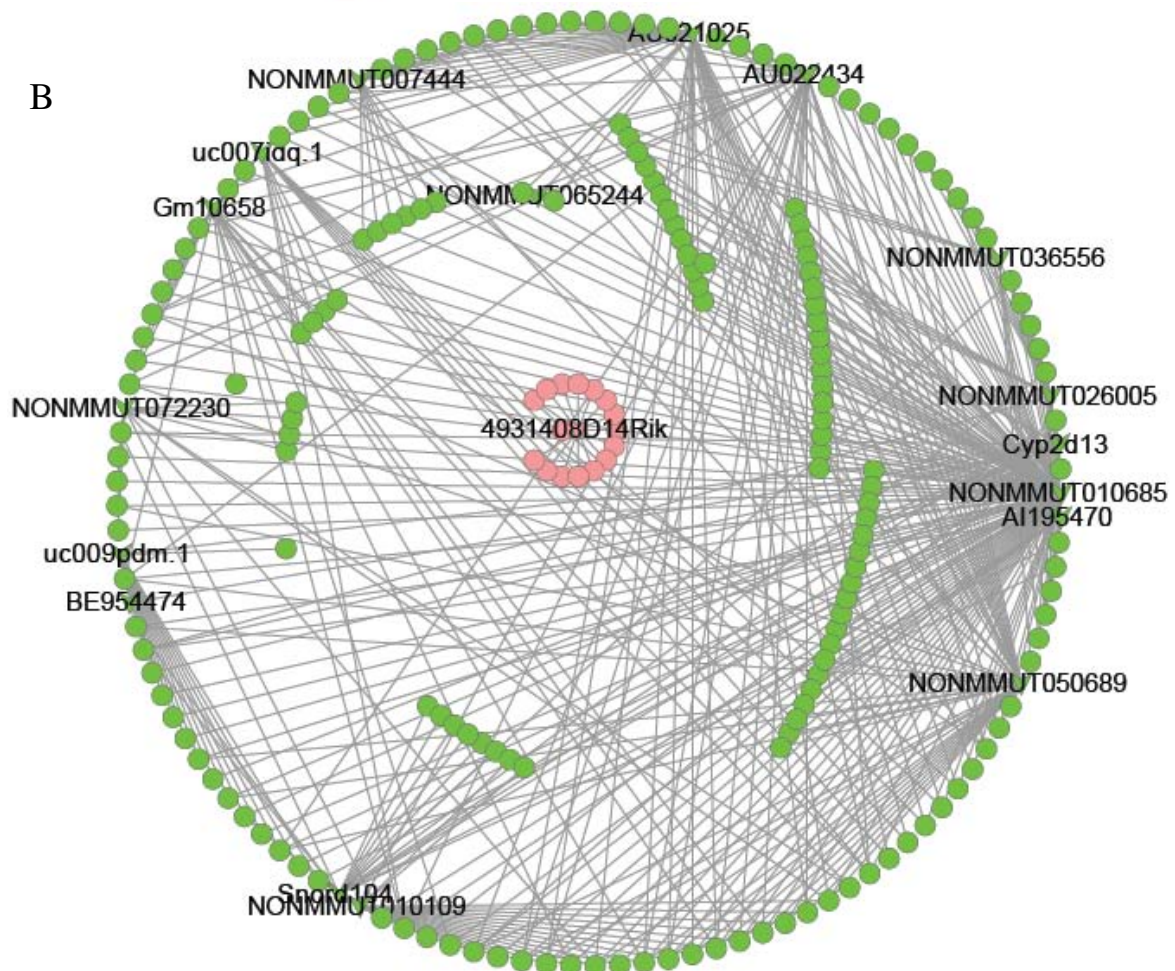

**Fig. S3 Ma et al**

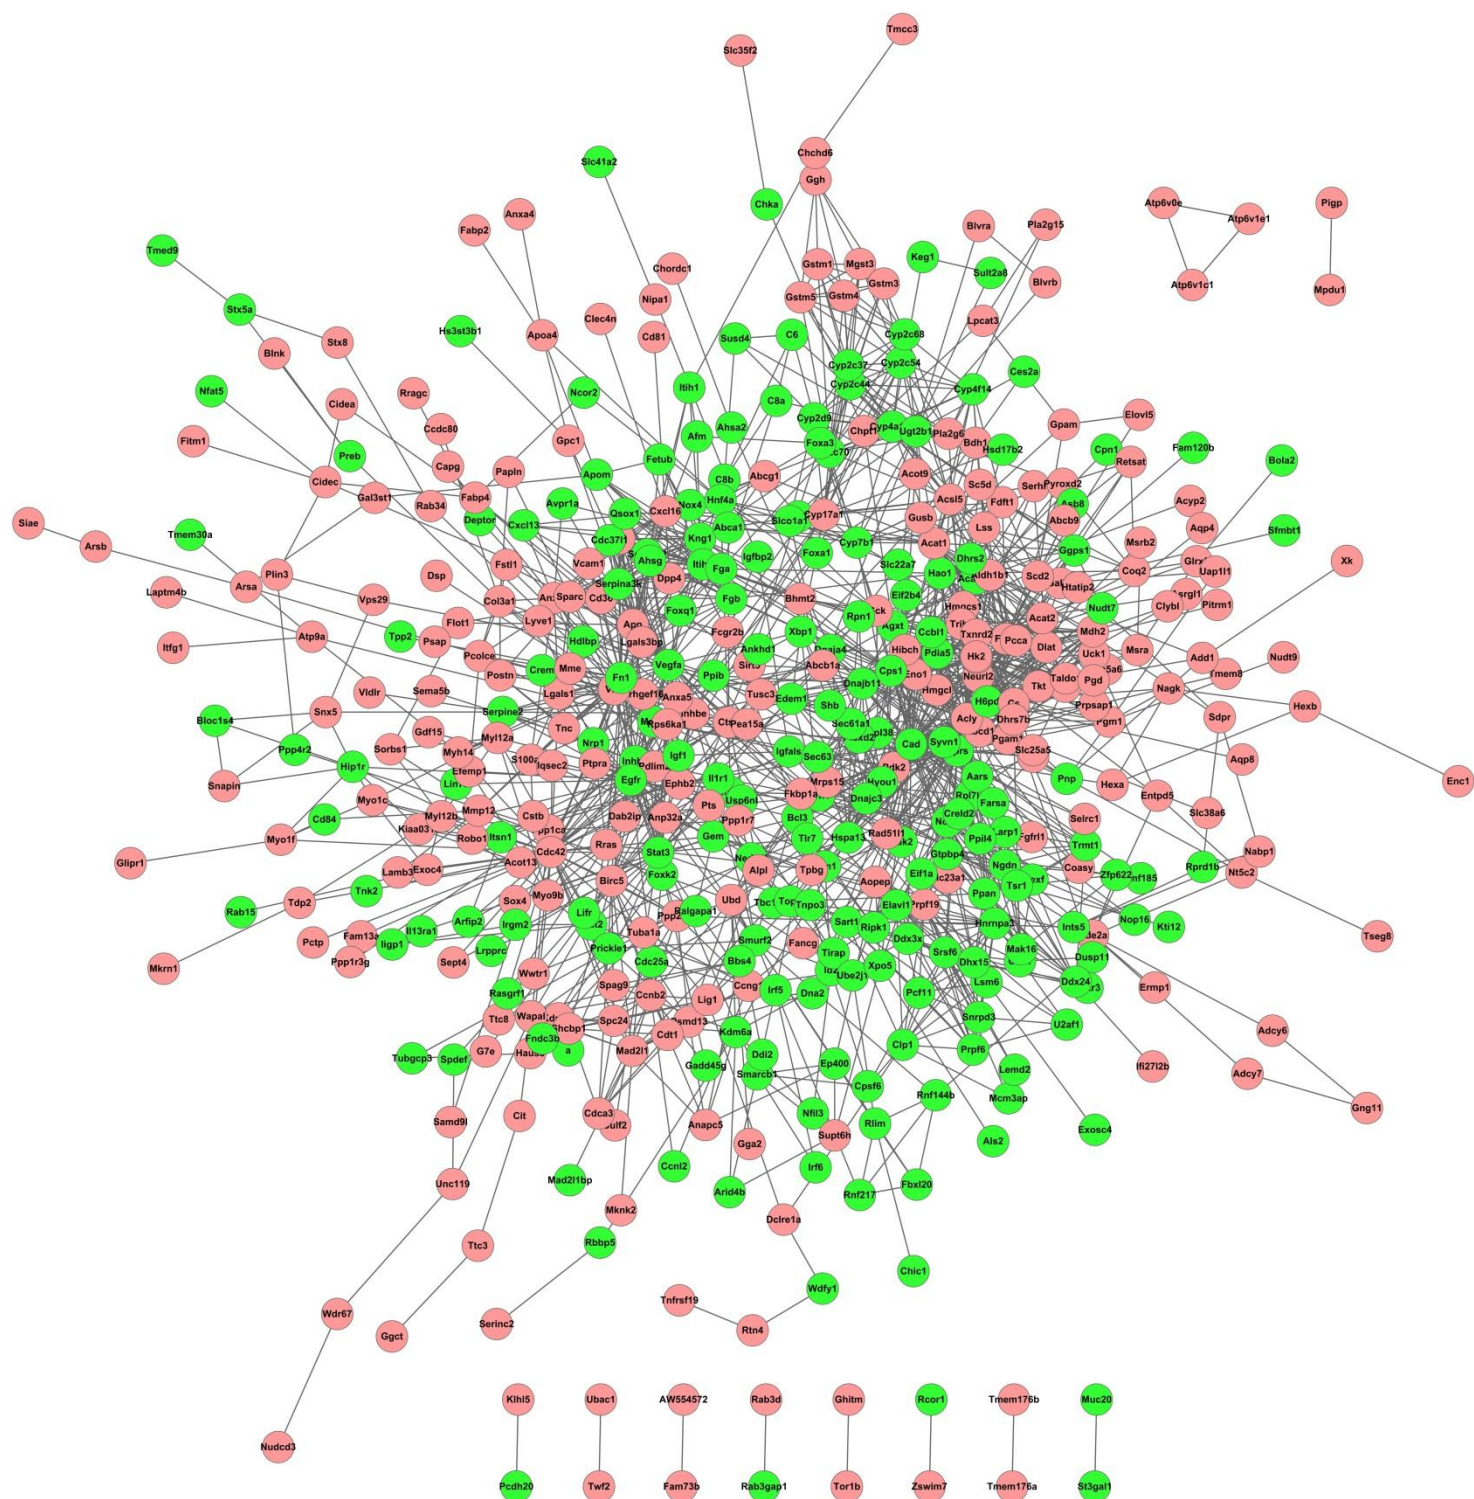

**Fig. S1.** Go-net analysis of differentially expressed mRNAs.

- A. Up-regulated genes GO-net.
- B. Down-regulated genes GO-net.

**Fig. S2.** Co-expression between differentially expressed lncRNAs and mRNAs.

- A. Co-expression network with statistically differentially expressed lncRNA and mRNA
- B. Subnetwork of lncRNA node degree>10

**Fig. S3.** Significantly up and down-regulated genes from the protein-protein interaction network. (Up-regulated genes were labeled in red, down-regulated genes were labeled in green.)
